**Biological Pathways and Gene Networks Link Inflammation and Vascular Remodeling  
to Both Heart Failure with Preserved and Reduced Ejection Fraction  
in Women across Ethnicities**

Qing Liu, Ph.D.<sup>1,2</sup>, Kei Hang K. Chan, Ph.D.<sup>2,3</sup>, Alan R. Morrison, M.D., Ph.D.<sup>4,5</sup>, Stephen T. McGarvey, Ph.D.<sup>1</sup>, Xi Luo, Ph.D.<sup>6</sup>, James G. Wilson, M.D.<sup>7</sup>, Adolfo Correa, M.D., Ph.D.<sup>8</sup>, Alexander P. Reiner, M.D.<sup>9,10</sup>, Jie Li, Ph.D.<sup>1,2</sup>, \*Simin Liu, M.D., Sc.D.<sup>1,2,5</sup>, \*Wen-Chih Wu, M.D.<sup>1,4,5</sup>

<sup>1</sup>Department of Epidemiology, School of Public Health, Brown University, Providence, RI 02912, USA

<sup>2</sup>Center for Global Cardiometabolic Health, Brown University, 121 South Main St, Providence, RI, 02903

<sup>3</sup> Department of Biomedical Sciences, City University of Hong Kong, Hong Kong

<sup>4</sup> Providence Veterans Affairs Medical Center, Providence, RI 02908, USA

<sup>5</sup> Alpert Medical School at Brown University, Providence, RI 02903, USA

<sup>6</sup> Department of Biostatistics and Data Science, School of Public Health, University of Texas Health Science Center at Houston, Houston, TX 77030, USA

<sup>7</sup> Department of Physiology and Biophysics, University of Mississippi Medical Center, Jackson, MS 39216

<sup>8</sup> Department of Medicine, University of Mississippi Medical Center, Jackson, MS 39216

<sup>9</sup> Department of Epidemiology, University of Washington, Seattle, WA 98195, USA

<sup>10</sup> Division of Public Health Sciences, Fred Hutchinson Cancer Research Center, Seattle, WA 98109, USA.

**\*Co-Corresponding Authors:**

Simin Liu [simin\\_liu@brown.edu](mailto:simin_liu@brown.edu)

Center for Global Cardiometabolic Health and Department of Epidemiology, Brown University, 121 South Main St, Providence, RI, 02903

Wen-Chih Wu [Wen-Chih.Wu@va.gov](mailto:Wen-Chih.Wu@va.gov)

Center of Innovation in Long Term Services & Support, Providence VA Medical Center, Providence, RI

Division of Cardiology, Department of Medicine, Alpert Medical School, Brown University, Providence, RI

**Abstract**

**Introduction:** Heart failure (HF) is understudied among women; especially, genomic evidence implicating shared or unique mechanisms of HF with respect to reduced or preserved ejection fraction (HFrEF, HFpEF) is lacking across ethnic populations of women. Prior genome-wide association studies (GWAS) have identified approximately 30 suggestive genetic variants for HF, although none have been specifically linked to HFrEF or HFpEF.

**Objectives:** We aimed to define, replicate, and annotate genetic variants to HFrEF, HFpEF, or both, as well as to investigate potential biological mechanisms underlying HFrEF and HFpEF among African American (AA) and European American (EA) women in three well-characterized, high-quality prospective cohorts, the Women's Health Initiative (WHI) study, the Jackson Heart Study (JHS), and the Framingham Heart Study (FHS).

**Methods:** GWAS analysis on HFrEF and HFpEF were first performed among 7,982 AA and 4,133 EA in the WHI, followed by pathway analysis employing two independent methodological platforms (GSA-SNP and Mergeomics) curating KEGG, Reactome, and

BioCarta pathway databases. GWAS signals and biological pathways identified using the WHI were replicated in the JHS and FHS. For all replicated pathways, we performed cross-phenotype and cross-ethnicity validation analyses to examine shared pathways between HFrEF and HFpEF, and phenotype-specific pathways, across ethnicities. We further prioritized key driver genes for HF according to specific pathways identified.

**Results:** We validated one previously reported genetic locus and identified six new ones, among which one locus was allocated to HFrEF and five to HFpEF. Additionally, we defined five biological pathways shared between HFrEF and HFpEF and discovered six HFpEF-specific pathways. These pathways overlapped in two main domains for molecular signaling: 1) inflammation and 2) vascular remodeling (including angiogenesis and vascular patterning), involving key driver genes from collagen and HLA gene families.

**Conclusions:** Our network analysis of three large prospective cohorts of women in the United States defined several novel loci for HF and its subtypes. In particular, several key driver genes reinforce the mechanistic role of inflammation and vascular remodeling in the development of HF, especially HFpEF. Given that therapeutic strategies developed for left ventricular dysfunction have had limited success for HFpEF, several new targets and pathways identified and validated in this study should be further assessed in risk stratification as well as the design of potential new HF interventions.

## 1 **Introduction**

2       According to the American Heart Association (AHA), approximately 6.5 million U.S.  
3 adults have heart failure (HF) in 2018<sup>1</sup>, representing a major cause of morbidity and mortality  
4 in the United States. Heart failure is phenotypically and genetically heterogeneous, and much  
5 remains unknown about the etiology for subtypes of HF, including HF with preserved  
6 ejection fraction (HFpEF) and HF with reduced ejection fraction (HFrEF). Of note as many  
7 as 40-71% of patients have HFpEF for which limited clinical treatment options are available  
8 with little to no impact on outcomes<sup>2</sup>. Moreover, HF is understudied in women, who  
9 experience a higher mortality than men<sup>1</sup>. African American (AA) women have the highest  
10 HF incidence, followed by Hispanic Americans (HA) and European Americans (EA), and  
11 morbidity and mortality are twice as high for AA women relative to EA<sup>3-6</sup>. Observational  
12 studies have shown that while patients with HFpEF and HFrEF often display similar clinical  
13 symptoms, they often have markedly different risk factors, underlying pathophysiological  
14 processes, and responses to clinical therapies<sup>7</sup>. Many therapies with unequivocal benefit in  
15 HFrEF have failed to show efficacy for HFpEF<sup>8,9</sup>. Thus, there is a urgent need to further  
16 research biological pathways and gene networks for HFpEF and HFrEF that could provide  
17 mechanistic insight into the disease processes and identify potential targets for novel  
18 treatment modalities, particularly for women, who are disproportionately affected by HF<sup>1</sup>.

19       Recent candidate gene studies and genome-wide association studies (GWAS) have  
20 identified several genetic loci (such as *ADRB1*, *USP3*, *ITPK1*, and *BAG3* genes<sup>10,11</sup>  
21 associated with HF risk. However, these studies are primarily focused on genes associated  
22 with inherited HFrEF and are limited by reproducibility, effect size, and lack of ethnic  
23 diversity<sup>10,11</sup>. Although women are at higher risk of HF, no studies to date have  
24 examined/observed sex-specific genetic variants. Moreover, few studies have directly  
25 investigated the genetic mechanisms underlying the two HF subtypes, HFpEF and

26 HFrEF<sup>12,13</sup>; and no studies were conducted in an ethnically diverse population of women. As  
27 genes tend to behave conjointly on HF processes, analyzing a cluster of genes with related  
28 biological functions, using an integrative pathway and network approach<sup>14,15</sup>, improves the  
29 statistical power to identify genetic variants of biological importance. To enhance the  
30 understanding of biological mechanisms underlying different HF phenotypes (HFpEF versus  
31 HFrEF) as well as genomic and ethnic diversity in women with HF, we therefore investigated  
32 genetic risk factors and biological pathways predisposing to HF and its subtypes among AA  
33 and EA women in the Women's Health Initiative (WHI) study. We replicated our findings  
34 using AA women from the JHS, EA from FHS, and HA women from the WHI.

35

## 36 **Methods**

### 37 Study Population

#### 38 *Discovery Population*

39 The WHI study enrolled 161,808 postmenopausal women aged between 50 and 79  
40 years old from 1993 to 1998. The original WHI study has two major components: a partial  
41 factorial randomized clinical trial (CT) including 68,132 participants and an observational  
42 study (OS) of 93,676 participants. The detailed study design has been reported elsewhere<sup>16</sup>.  
43 Briefly, medical records from enrollment through September 2014 for 44,174 WHI  
44 participants, including all women randomized to the hormone trial component (n = 27,347)  
45 and all AA participants (n = 11,880) and HA participants (n = 4,947) from the CT and the  
46 OS, were sent to the University of North Carolina (UNC) for HF adjudications.

47 Of the participants enrolled in the WHI-OS, 8,515 self-identified AA women had  
48 consented to and were eligible for the WHI-SNP Health Association Resource (SHARe), and  
49 of the participants enrolled in the WHI hormone trial, 4,909 EA women were included in the  
50 WHI-Genomics and Randomized Trials Network (GARNET). After quality control, the

51 standard GWAS and pathway analyses were conducted among 8,298 AA and 4,257 EA  
52 participants of the WHI. Considering the lack of replication cohort of HA participants in the  
53 WHI-SHARe, we treated the HA participants as a replication sample in the pathway analysis.

54

#### 55 *Population for validation and replication*

56 The current study included three populations as validation and replication: AA in the  
57 Jackson Heart Study (JHS), EA in the Framingham Heart Study (FHS), and HA in the WHI-  
58 SHARe. Considering the WHI only enrolled postmenopausal women, we replicated the  
59 proposed analyses among women in the JHS and FHS. The main FHS enrolled three  
60 generations: the original generation (started in 1948), offspring generation (started in 1971),  
61 and generation three (started in 2005). Because of the poor measurement of left ventricular  
62 ejection fraction (LVEF) among the original generation and the relatively young age of  
63 generation three (baseline age < 40 years old), we only included the offspring generation in  
64 the analysis. In total, we conducted the proposed analyses among 1,871 AA women in the  
65 JHS, 1,764 EA women in the FHS, and 3,461 HA women in the WHI-SHARe.

66

#### 67 Definition of Heart Failure

68 In the WHI, HF adjudication was based on the Atherosclerosis Risk in Communities  
69 (ARIC) classification guidelines<sup>17</sup>, in which HF was defined as having acute decompensated  
70 HF (ADHF) and chronic stable HF<sup>18</sup>. Participants with adjudicated HF were further classified  
71 as HFrEF or HFpEF according to their LVEF. For patients with ADHF, those with LVEF <  
72 45% were considered as HFrEF and those with LVEF  $\geq$  45% were considered as HFpEF. For  
73 patients with chronic stable HF, baseline LVEF or lowest estimated LVEF on medical  
74 records were used to classify HF subtypes. Similar criteria were applied to replication

75 cohorts, the JHS and FHS. Participants without LVEF were excluded from the analysis  
76 (n=440).

77

## 78 Genotype Data

79 Genome-wide genotyping of the WHI-SHARE and JHS participants were performed  
80 using the Affymetrix 6.0 array (Affymetrix, Inc, Santa Clara, CA), and WHI-GARNET and  
81 FHS participants were genotyped using Illumina HumanOmni1-Quad SNP platform  
82 (Illumina, Inc, San Diego, CA). As the gene chips used for genotyping are designed to  
83 capture common genetic variants, genetic variants with frequency  $\geq 5\%$  were genotyped.  
84 Reference panels from the 1000 Genomes (1000G) Project Consortium (Version 3, March  
85 2012 release), which provide near complete coverage of common genetic variation with  
86 minor allele frequency  $\geq 0.5\%$ , were used for genotype imputation.

87

## 88 Statistical Analysis

### 89 *Genome-wide association analyses*

90 We performed standard GWAS analysis for HF<sub>r</sub>EF and HF<sub>p</sub>EF for AA and EA  
91 women, using multivariable logistic regressions. The regression models were implemented  
92 using allelic dosage at each SNP (single-nucleotide polymorphism) as the independent  
93 variable, with covariate adjustment for age, age<sup>2</sup>, and first four principal components (PCs)  
94 for global ancestry in all three cohorts. We also adjusted for region in two WHI cohorts, and  
95 randomized hormone treatment group and baseline hysterectomy status in the WHI-  
96 GARNET study. Since the associations between germline genetic variants and HF are not  
97 confounded by demographic and lifestyle factors, no other confounders were adjusted in the  
98 GWAS analysis. The general form of the GWAS model is specified as follows:

99

$$\text{logit Pr}[Y|G, V] = \alpha_0 + \alpha_g G + \alpha_v V,$$

100 where Y denotes HF subtype, G denotes SNPs, and V denotes adjusted covariates. Common  
101 genetic variants reaching the suggestive significance ( $5 \times 10^{-6}$ ) were identified as potential  
102 GWAS hits. Suggestive SNPs were validated in the JHS and FHS using nominal *P* value <  
103 0.05, followed by cross-ethnicity meta-analyses combining AA, EA, and HA women from  
104 WHI, JHS, and FHS using METAL<sup>19</sup> (FDR-adjusted *q* value < 0.05).

105

#### 106 *Pathway analysis*

107 We obtained knowledge-driven metabolic and signaling pathways from three  
108 databases: the Kyoto Encyclopedia of Genes and Genomes (KEGG)<sup>20</sup>, Reactome<sup>21</sup>, and  
109 BioCarta<sup>22</sup>. SNPs showing potential associations with HF subtypes (*P* value < 0.05 in GWAS)  
110 were mapped to relevant genes based on their chromosome locations or functions, and further  
111 mapped to biological pathways. Each pathway was tested for enrichment of genetic signals  
112 for HFrEF and HFpEF by ethnic groups. To avoid potential biases due to a particular method,  
113 we applied two different well-established methods based on known biological pathways: 1)  
114 GSA-SNP<sup>14</sup>, and 2) Mergeomics<sup>15</sup>. Pathways were defined as significant if they met the  
115 following criteria: 1) identified by both methods from the WHI study with a FDR-adjusted *q*  
116 value < 0.2; and 2) validated by GSA-SNP or Mergeomics with a significant *P* value after  
117 Bonferroni correction in JHS (as replication of WHI-AA) and FHS (as replication of WHI-  
118 EA). We then performed cross-phenotype and cross-ethnicity analyses in WHI to examine  
119 shared pathways between HFrEF and HFpEF, as well as phenotype-specific pathways, across  
120 ethnicities (AA, EA, and HA).

121

#### 122 *Key Driver Analysis for Identification of Key Regulatory Genes for HF-related Pathways*

123 As hundreds of genes are involved in the biological pathways, we seek to further  
124 prioritize key driver (KD) genes, defined as genes that played a central role in the disease



125 progress and once perturbed, should have major impact on many other genes. We integrated  
126 all genes involved in significant pathways with seven Bayesian networks and one protein-  
127 protein interaction network using KD analysis methods<sup>15,23,24</sup>. We designed a normalized  
128 rank score (NRS) to summarize the consistency and strength of identified KD genes across  
129 multiple networks<sup>25</sup>, where  $NRS = \frac{C_{KD}}{N} \times \sum_{i=1}^{C_{KD}} R_{KD_i}$ ;  $C_{KD}$  is the count of networks from  
130 which a KD was identified;  $C_{KD}$  is then normalized by total number of networks N to  
131 represent the consistency of a KD across all networks tested (Bayesian networks from seven  
132 tissues, including adipose, blood, brain, islet, liver, kidney, and muscle, and one protein-  
133 protein interaction). The KD strength is represented by the summation of normalized  
134 statistical rank in each network  $i$  ( $R_{KD_i}$ ) across all networks from which the KD is identified;  
135  $R_{KD_i} = \frac{Rank_{KD_i}}{N_{KD_i}}$ , which was calculated by dividing the rank of a KD based on the  $P$  values of  
136 the Fisher exact test in descending order ( $Rank_{KD_i}$ ) by the total number of KDs identified  
137 from a network  $i$  ( $N_{KD_i}$ ). KDs with high NRS were those with high network enrichment for  
138 pathways and high consistency across tested networks.

139

## 140 **Results**

141 Among WHI participants, 860 (10.4%) AA, 601 (14.1%) EA, and 165 (4.7%) HA  
142 were initially identified as having HF. After excluding those without LVEF measurement  
143 (316 WHI-AA and 124 WHI-EA), we performed primary analyses among 7,982 AA and  
144 4,133 EA women in the WHI, and replication analyses among 1,853 AA women in the JHS,  
145 1,755 EA women in the FHS, and 3,461 HA women in the WHI. The descriptive statistics on  
146 demographic and lifestyle factors of each study population are shown in **Table 1**. Compared  
147 to WHI-EA, WHI-AA women were younger in age and less physically active, had higher  
148 BMI and lower intakes of alcohol and total calories, and with a higher proportion of  
149 cardiovascular disease and diabetes.

150

151 Identification of Significant Genetic Loci Using Standard GWAS Analysis

152 In the validation analysis of previously reported 30 loci for HF from the GWAS  
153 catalog<sup>26</sup>, we validated one locus and further allocated it to HFpEF in the WHI, JHS, and  
154 FHS populations with FDR-adjusted q value < 0.05. The validated SNP rs4420638 is located  
155 on chromosome 19 and close to *APOE* and *APOC* genes. Detailed information regarding the  
156 validated locus can be found in **Supplemental Table 1**.

157 The standard GWAS results for HF<sub>r</sub>EF and HF<sub>p</sub>EF within WHI-AA (n=7,982) and  
158 WHI-EA (n=4,133) are shown in the Manhattan plots (**Supplementary Figure 1**). Among  
159 AA, this discovery analysis revealed one significant ( $P < 5 \times 10^{-8}$ , rs35900865) and 57  
160 suggestive ( $P < 5 \times 10^{-6}$ ) SNPs related to HF<sub>r</sub>EF, and three significant ( $P < 5 \times 10^{-8}$ , rs7834398,  
161 rs78668964, and rs12203350) and 94 suggestive ( $P < 5 \times 10^{-6}$ ) SNPs related to HF<sub>p</sub>EF.  
162 Among EA, we failed to identify significant SNPs, but found 50 suggestive ( $P < 5 \times 10^{-6}$ )  
163 SNPs related to HF<sub>r</sub>EF and 47 SNPs for HF<sub>p</sub>EF.

164 In the replication analysis for AA women among JHS (n=1,853) participants, eight  
165 SNPs from four loci (lead SNPs: rs12067046, rs114553497, rs10229703, and rs149663839)  
166 out of 94 SNPs for HF<sub>p</sub>EF reached the threshold of  $P < 0.05$ . In the replication analysis for  
167 EA women among FHS (n=1,755) participants, one SNP (rs12719020) reached the  $P < 0.05$   
168 threshold among the 50 suggestive SNPs for HF<sub>r</sub>EF; and 19 SNPs (concentrated on  
169 chromosome 16, lead SNP: rs12599260) among the suggestive 47 SNPs for HF<sub>p</sub>EF reached  
170 the threshold of  $P < 0.05$ . The effect of all lead SNPs on HF was in the same direction in the  
171 discovery population and the ethnicity-specific replication population. In the cross-ethnicity  
172 meta-analysis combining AA, EA, and HA women from the WHI, JHS and FHS, all loci  
173 passed ethnicity-specific validation and were further validated with FDR-adjust q value of <

174 0.05 (**Table 2**). More information regarding the newly discovered loci can be found in  
175 **Supplemental Table 1**.

176

### 177 Identification of Biological Pathways Using Integrative Pathway Analysis

178 We initially identified 21 pathways for HFrEF (nine for EA and 12 for AA) and 42  
179 pathways for HFpEF (31 for EA and 17 for AA) among WHI participants, of which 11  
180 pathways were validated for HFrEF and 15 pathways for HFpEF, among the JHS and FHS  
181 women. The results of cross-phenotype and cross-ethnicity analysis were presented in **Table**  
182 **3 and Supplemental Tables 2 and 3**. Based on the functions of the pathways, we identified  
183 two main overarching domains with some cell signaling and metabolism common to both: 1)  
184 angiogenesis and vascular patterning and 2) inflammation. Five pathways, emerging from  
185 angiogenesis and vascular patterning, were shared between HFrEF and HFpEF across AA,  
186 EA, and HA women, namely, extracellular matrix (ECM)-receptor interaction, cell adhesion  
187 molecules (CAMs), axon guidance, netrin-1 signaling, and developmental biology (**Figure**  
188 **1**). The five shared pathways were highly interconnected as demonstrated by a shared  
189 common set of 256 genes among them (**Figure 2**).

190 In addition, we found six pathways specifically enriched for HFpEF across AA and  
191 EA, namely, adherens junction, endocytosis, phosphatidylinositol signal system, vascular  
192 smooth muscle contraction, and heparan sulfate/heparin (HS)-glycosaminoglycan (GAG)  
193 biosynthesis and degradation; all of which corresponded to the domain of angiogenesis and  
194 vascular patterning (**Figures 1 and 3**). Of the aforementioned six HFpEF-specific pathways,  
195 the first three pathways were further replicated in the WHI-HA participants.

196

## 197 Identification of Key Drivers for HFpEF and HFrEF

198 In the KD analysis to identify potential genes that played a central role in the  
199 significant pathways for HF, we used eight different regulatory or interaction networks that  
200 capture gene-gene or protein-protein interactions among the pathways. The top 10 KD genes  
201 for the five shared pathways (developmental biology, axon guidance, netrin-1 signaling,  
202 ECM-receptor interaction, and CAMs) between HFrEF and HFpEF across two ethnicities are  
203 *COL1A1*, *COL1A2*, *COL3A1*, *COL4A2*, *COL5A1*, and *COL6A3* from ECM and axon  
204 guidance pathways, and *HLA-DQA1*, *HLA-DQB1*, *HLA-DRB1*, and *HLA-DMB* from CAMs  
205 pathway (**Figure 2 and Supplemental Figure 2**). For the six pathways specific for HFpEF,  
206 the top 10 KD genes are *MYH11*, *MYLK* and *PRKACB* from vascular smooth muscle  
207 contraction, *PRKCG*, *PIK3R1* from phosphatidylinositol signal system, *HGS*, *EGF*, and  
208 *SH3KBP1* from endocytosis, and *CTNNB1* and *RAC1* from adherens junction (**Figure 3 and**  
209 **Supplemental Figure 2**). Variants in the identified top KD genes collectively account for 15-  
210 19% and 15-16% variations of HFrEF and HFpEF among women in the WHI.

211

## 212 **Discussion**

213 In this GWAS analysis of 7,982 AA and 4,133 EA women from the WHI, we  
214 validated one previously reported genetic locus and allocated it to HFpEF, and additionally  
215 discovered one HFrEF and five HFpEF novel genetic loci of potential importance. Also, five  
216 biological pathways appeared to be shared for both HFrEF and HFpEF across AA, EA, and  
217 HA women, and six pathways were specific for HFpEF across AA and EA women. Our  
218 results suggested the presence of core mechanisms across HF subtypes (HFrEF and HFpEF),  
219 such as vascular remodeling and inflammation alone with some common overlapping  
220 mechanisms of cell signaling and metabolism. It is important to note the paucity of  
221 cardiomyocyte-specific gene variants, including those for nuclear envelope proteins,

222 sarcomere proteins, cytoskeletal, and calcium regulatory proteins, given their extensive  
223 involvement in familial dilated cardiomyopathies. Our data highlight the genetic and/or  
224 biological significance of the vascular remodeling and inflammation, rather than that of the  
225 cardiomyocyte in the acquisition of HFpEF and HFrEF.

226         Given the increased diversity of gene involvement, the genetic architecture underlying  
227 HFrEF and HFpEF remains challenging to delineate. We validated one previously reported  
228 locus close to *APOE* and *APOC*, and further allocated it to HFpEF. Genes in the  
229 apolipoprotein family (*APOE*, *APOC1*, *APOC2*, etc.) encode lipid transport proteins that  
230 regulate cholesterol metabolism and are associated with obesity and cardiovascular  
231 disease<sup>27,28</sup>. Of note, we were not able to validate other suggestive HF loci reported from  
232 previous European-based cohorts, which may be due to effect modifications by sex and/or  
233 ethnicity.

234         In addition, we discovered one HFrEF and five HFpEF loci from intergenic regions.  
235 Variant rs12719020, associated with HFrEF, is located upstream (< 20 Kb) to *COBL*, a gene  
236 related to vasculitis and type 1 diabetes<sup>29</sup>. For variants associated with HFpEF, rs12067046 is  
237 located 500 Kb downstream of *PLXNA2*, which is related to the development of blood  
238 vessel<sup>30</sup> and inflammatory-induced immune disorders<sup>31</sup>; the linkage disequilibrium (LD)  
239 block around rs12599260 is upstream (5 Kb) to *HEATR3*, which regulates inflammatory  
240 immune response<sup>32</sup>; rs149663839 is located upstream (50 Kb) to *CAT*, a key antioxidant  
241 enzyme, which is hypothesized to play a role in the development of many chronic or late-  
242 onset diseases such as HF<sup>33</sup>; *ACTA1* (60 Kb to the LD block around rs114553497) and  
243 *CALDI* (5 Kb to rs10229703) are fundamental genes for skeletal/smooth muscle contraction  
244 and had been linked to pulmonary hypertension in animal studies<sup>34,35</sup> (**Table 2 and**  
245 **Supplemental Table 1**).

246 Genetic pathway and network analysis, as novel approaches to integrate genetic  
247 signals that complements current GWAS analysis, have been yielded new insight into the  
248 biology of coronary heart disease<sup>36</sup>, type 2 diabetes<sup>25</sup>, obesity<sup>37</sup>, and LV function<sup>38</sup>. Our  
249 pathway-based analysis revealed five consistent pathways between HFrEF and HFpEF across  
250 the two ethnicities (**Table 3**). All the five pathways were linked to angiogenesis and vascular  
251 patterning, among which three pathways, ECM-receptor interaction, CAMs, and Netrin-1  
252 signaling were also linked to inflammation (**Figure 1**). From the five pathways shared by  
253 both HFrEF and HFpEF, three pathways, axon guidance, ECM-receptor interaction, and  
254 CAMs, had been implicated previously in thromboembolic cardiovascular disease, type 2  
255 diabetes, and LV function<sup>25,38</sup>.

256 There appears to be a substantial overlap in the major areas of inflammation and  
257 angiogenesis among shared pathways between HFrEF and HFpEF. The ECM is an intricate  
258 network composed of multidomain macromolecules organized to support mechanical and  
259 structural properties of cells and tissue but also to control behavioral characteristics of cells,  
260 including proliferation, adhesion, migration, polarity and differentiation<sup>39,40</sup>. Major  
261 components include collagens, proteoglycans, elastin, and cell-binding glycoproteins, each  
262 with distinct physical and biochemical properties. ECM molecules connect to the cells  
263 through integrins, syndecans, and other receptors which provides signaling input in addition  
264 to mechanical support<sup>41</sup>. This ECM-receptor interaction contributes to angiogenesis and  
265 vascular patterning in multiple ways, including the organization and maintenance of gradients  
266 for angiogenic factors like vascular endothelial growth factor (VEGF)-A<sup>42,43</sup>. Endothelial  
267 ECM receptors like intergrins play a critical role in adhesion and migration via control of  
268 cytoskeletal dynamics while at the same time directing cell-cell interactions through  
269 pathways like Notch signaling in order to coordinate sprouting and tube organization in early  
270 capillary networks<sup>44</sup>. ECM-CAM interactions also have the ability to influence inflammatory

271 state of both vascular and immune cells through focal adhesion complexes comprised of  
272 integrins, protein kinases such as focal adhesion kinase (FAK), Src and many other kinases,  
273 adaptor proteins such as Shc, signaling intermediates such as phosphoinositide 3-kinase  
274 (PI3K), Rho and Rac GTPases, and actin binding cytoskeletal proteins<sup>45</sup>. Further, cardiac  
275 ECM (primarily collagen I) may also play a critical role in providing a platform for  
276 cardiomyocytes to maintain structure and function, and any change in ECM properties  
277 following an insult has potential to drive the progression toward HF, including myocardial  
278 fibrosis and altered ECM protein orientation<sup>46,47</sup>. Details regarding the main functions of  
279 other identified pathways can be found in **Supplemental Table 4**.

280 Taken together, the above identified pathways highlight the previously known but  
281 likely underappreciated importance of angiogenesis and vascular patterning as well as  
282 inflammation on HF that appear to link HFrEF and HFpEF to other cardio-metabolic health  
283 outcomes via multiple mechanisms. The fact that these pathways were consistently identified  
284 across multiple ethnicities further highlights a convergent or central role in the joint  
285 mechanisms between interrelated cardiac diseases.

286 We additionally identified six pathways specifically for HFpEF across ethnicities. All  
287 the six pathways were linked to angiogenesis and vascular patterning, from which three  
288 pathways (phosphatidylinositol signal system, HS-GAG biosynthesis and degradation) were  
289 additionally linked to inflammation (**Figure 1**). None of the six HFpEF pathways have  
290 previously been implicated in pathway-based studies, making these findings novel.

291 Specifically, the phosphatidylinositol signaling system is critically linked to  
292 inflammation and vascular remodeling, and in particular angiogenesis and vascular  
293 patterning. Activation of the PI3K pathway can occur in response to a variety of extracellular  
294 (e.g., ECM, CAM) as well as growth factor (e.g., fibroblast growth factor, VEGF-A)  
295 signaling and can regulate broad spectrum of molecular functions which involve

296 proliferation, adhesion, migration, invasion, metabolism and cell survival<sup>48,49</sup>. Activation of  
297 the PI3K pathway involves recruitment via Src-homology 2 (SH2) to phosphotyrosine  
298 residues on the intracellular portion of membrane receptors, followed by phosphorylation of  
299 phosphatidylinositol-4,5-bisphosphate (PIP2) to generate the second messenger molecule  
300 PIP3. The Akt family of serine/threonine kinases has been shown to be the primary  
301 downstream mediator of the effects of PI3K. Through the phosphorylation of I $\kappa$ B kinase  
302 (IKK) and activation of nuclear factor  $\kappa$  B (NF- $\kappa$ B) transcriptional activity, Akt leads to  
303 upregulation of inflammatory and prosurvival genes<sup>50-53</sup>. Akt can also activate mTOR,  
304 resulting in stabilization of hypoxia inducible factor-1 (HIF-1) and consequent expression of  
305 VEGF-A in order to promote angiogenesis<sup>54-56</sup>. PI3K signaling may also play a role in  
306 regulating cardiomyocyte size, survival, and inflammation during cardiac hypertrophy and  
307 HF, in part via calcium signaling<sup>57,58</sup>. Details regarding the main functions of other identified  
308 pathways can be found in **Supplemental Table 4**. Detailed knowledge of these relationships  
309 at the molecular level will allow researcher to understand the distinct mechanisms underlying  
310 HFpEF and enable the development of effective therapeutic strategies.

311 In addition, we observed two pathways with highly significant *P* values: Rac1  
312 pathway for HF<sub>r</sub>EF within EA and HFpEF within AA, and signaling by bone morphogenetic  
313 proteins (BMP) pathway for HFpEF among AA (**Supplemental Tables 2, 3, and 4**). Rac1 is  
314 a GTPase protein, a member of the Rac subfamily of the Rho family of GTPases, and plays a  
315 critical role in inflammation and vascular remodeling. Activated Rac1 can promote NF- $\kappa$ B  
316 signaling and reactive oxygen species (ROS) production via nicotinamide adenine  
317 dinucleotide phosphate (NADPH) oxidase, both known activators of the NACHT, LRR, and  
318 PYD domains-containing protein 3 (NLRP3) inflammasome protein complex that promotes  
319 expression of the critical inflammatory cytokine, interleukin-1 $\beta$  (IL-1 $\beta$ )<sup>59-61</sup>. A number of  
320 studies have found that activation of Rac1 is associated with atrial fibrillation<sup>62</sup>,



321 atherosclerotic calcification<sup>63</sup>, cardiac hypertrophy<sup>64</sup>, and HF<sup>65</sup>, suggesting Rac1 may have  
322 strong potential as a new therapeutic target<sup>66</sup>. BMPs belong to transforming growth factor  
323 beta (TGF $\beta$ ) superfamily, which is one of the most potent profibrogenic cytokine systems  
324 governing cardiac fibrosis<sup>67</sup>. BMP signaling is also increasingly recognized for its influence  
325 on endocrine-like functions in postnatal cardiovascular and metabolic homeostasis<sup>68</sup>. Some  
326 BMP molecules, such as BMP9 and BMP10, had been found to reduce pulmonary arterial  
327 hypertension, cardiac fibrosis, and myocardial infarction, thereby providing potentially  
328 benefits for HF patients<sup>68,69</sup>.

329 The KD gene analysis prioritized KD genes of coronary heart disease<sup>70</sup>, type 2  
330 diabetes<sup>25</sup>, and obesity<sup>71</sup>, but has not been performed for HF. In our KD gene analysis based  
331 on shared pathways between HFrEF and HFpEF, we found that the KD genes belong to the  
332 collagen gene family, shared between axon guidance and ECM-receptor interaction, and  
333 HLA genes from CAMs pathway. HLA gene family members are components of the major  
334 histocompatibility complex (MHC) and play a central role in the immune system with  
335 established allelic contributions to type 1 diabetes susceptibility<sup>72</sup>, and a host of inflammatory  
336 disorders, including rheumatoid arthritis<sup>73</sup>, Sjögren's<sup>74</sup>, ulcerative colitis<sup>75</sup>, and systemic  
337 lupus erythematosus<sup>76</sup>. Collagen gene family, as previously described, encodes proteins to  
338 regulate vascular patterning and maintain the structure and function of cardiomyocytes.  
339 These KD genes further highlight the effect of angiogenesis, vascular patterning and  
340 inflammation in HF. Importantly, genes *COL1A1* and *COL3A1* were also found to be the KD  
341 genes for thromboembolic cardiovascular disease and type 2 diabetes<sup>25</sup>; thus, showing  
342 potential shared biological mechanisms underlying these interrelated diseases as well as the  
343 pleiotropic effects of these KD genes. *COL4A2* is a critical component of the basement  
344 membrane, and loss of function leads to disordered capillary networks during  
345 angiogenesis<sup>77,78</sup>. The C-terminal portion of *COL4A2* is a potent inhibitor of angiogenesis,

346 prevents proliferation and migration of endothelial cells and induces apoptosis<sup>79</sup>. Moreover,  
347 variants of *COL4A2* are implicated in vascular cell survival, atherosclerotic plaque stability  
348 and risk of myocardial infarction, as well as hemorrhagic stroke<sup>80,81</sup>.

349 The KD genes for HFpEF were mainly from the vascular smooth muscle contraction,  
350 phosphatidylinositol signal system and endocytosis pathways, which further highlight the  
351 functional roles of inflammation and systemic vascular remodeling in the pathogenesis of  
352 HFpEF. Two examples of genes intricately linked to vascular wall mechanics rather than  
353 cardiomyocyte mechanics include *MYH11* and *MYLK*. *MYH11* encodes one of the smooth  
354 muscle cell myosin heavy chains, and variants are associated with familial thoracic aneurysm  
355 syndrome<sup>82,83</sup>. *MYLK* encodes a myosin light chain kinase that is implicated in inflammatory  
356 responses, apoptosis, and vascular permeability. Variants of *MYLK* are associated with  
357 arterial and aortic aneurysmal disease<sup>84,85</sup>.

358 Several strengths and limitations need to be considered when interpreting these  
359 findings. First, this study represents the first attempt to systematically examine and integrate  
360 genetic variants for HF phenotypic subtypes using pathway and network approaches with  
361 special emphasis on revealing mechanistic similarities and differences between HFpEF and  
362 HFpEF with higher statistical efficiency. The second strength is the large, previously  
363 validated and high-quality phenotyping of women of different ethnic backgrounds, which  
364 allows the detection of HF mechanisms shared across ethnicities. Thirdly, two additional  
365 high-quality cohorts, JHS and FHS, served as replication populations supporting the  
366 robustness of our findings. One major limitation is that our results were based upon germline  
367 mutations. Therefore, it is unclear whether mutations in the identified genomic regions and  
368 pathways would impact downstream expression levels in particular tissues of interest, and  
369 whether the identified genes and pathways are up-/down-regulated before and after HF  
370 events. This highlights the critical need for future studies that will quantify the downstream

371 gene expression changes by comparing population with and without HF. Moreover, it will be  
372 important to validate these results in men in order to examine the effect of sex on HF and to  
373 replicate our finding using suitable animal models of HF in order to further validate these  
374 newly discovered pathways.

375

## 376 **Conclusion**

377 This study validated previously identified locus and defined novel loci for HF and its  
378 subtypes, implicating specific molecular pathways, some shared and others unique, that  
379 contribute to HF and its subtypes. We highlight the significant mechanistic role of the  
380 inflammation and vascular remodeling (angiogenesis and vessel patterning) in the genetic  
381 signals associated with HFpEF and HFrEF, supporting the concept that HF is largely a  
382 disease of the systemic vasculature. Finally, this work defines several leading and novel  
383 targets and pathways for risk stratification and design of potential new HF interventions.

384

385 **Funding**

386 This study is funded by the American Heart Association grant 17UNPG33750001.

387

388 **Acknowledgements**

389 The WHI program is funded by the National Heart, Lung, and Blood Institute, National

390 Institutes of Health, U.S. Department of Health and Human Services through contracts

391 HHSN268201600018C, HHSN268201600001C, HHSN268201600002C,

392 HHSN268201600003C, and HHSN268201600004C.

393

394 The Jackson Heart Study (JHS) is supported and conducted in collaboration with Jackson

395 State University (HHSN268201800013I), Tougaloo College (HHSN268201800014I), the

396 Mississippi State Department of Health (HHSN268201800015I) and the University of

397 Mississippi Medical Center (HHSN268201800010I, HHSN268201800011I and

398 HHSN268201800012I) contracts from the National Heart, Lung, and Blood Institute

399 (NHLBI) and the National Institute on Minority Health and Health Disparities (NIMHD).

400 The authors also wish to thank the staffs and participants of the JHS.

401

402 From the Framingham Heart Study of the National Heart Lung and Blood Institute of the

403 National Institutes of Health and Boston University School of Medicine. This project has

404 been funded in whole or in part with Federal funds from the National Heart, Lung, and Blood

405 Institute, National Institutes of Health, Department of Health and Human Services, under

406 Contract No. 75N92019D00031.

407

408 Dr. Alan R. Morrison is supported by the Research Project Grant NIH NHLBI

409 R01HL139795, the Institutional Development Award (IDeA) from NIH NIGMS

410 P20GM103652, and the Career Development Award Number 7IK2BX002527 from the

411 United States Department of Veterans Affairs Biomedical Laboratory Research and

412 Development Program.

413

414 **Disclaimer**

415 The views expressed in this manuscript are those of the authors and do not necessarily

416 represent the views of the National Heart, Lung, and Blood Institute; the National Institutes

417 of Health, the Department of the Veterans Affairs; or the U.S. Department of Health and

418 Human Services.

## Tables and Figures

**Table 1. Baseline Characteristics of African and European American Women in Study Populations <sup>a</sup>**

|                                                        | Discovery Populations |                     | Replication Populations <sup>b</sup> |                     |                     |
|--------------------------------------------------------|-----------------------|---------------------|--------------------------------------|---------------------|---------------------|
|                                                        | WHI-AA<br>(N=7,982)   | WHI-EA<br>(N=4,133) | JHS-AA<br>(N=1,853)                  | FHS-EA<br>(N=1,755) | WHI-HA<br>(N=3,461) |
| <b>No. of participants with HF, n (%) <sup>c</sup></b> | 544 (6.8)             | 477 (11.5)          | 166 (9.0)                            | 108 (6.2)           | 100 (2.9)           |
| HFpEF, n (%)                                           | 345 (63.4)            | 304 (63.7)          | 140 (84.3)                           | 103 (95.4)          | 67 (67.0)           |
| HFrfEF, n (%)                                          | 199 (36.6)            | 173 (36.3)          | 26 (15.7)                            | 5 (4.6)             | 33 (33.0)           |
| Years of follow-up, year (SD)                          | 10.0 (5.2)            | 8.9 (5.3)           | 6.4 (2.3)                            | 38.9 (4.8)          | 10.4 (5.3)          |
| <b>Age, year (SD)</b>                                  | 61.5 (7.0)            | 65.6 (6.9)          | 55.5 (12.7)                          | 34.8 (9.8)          | 60.2 (6.7)          |
| <b>Region, n(%) <sup>d</sup></b>                       |                       |                     |                                      |                     |                     |
| Northeast                                              | 1410 (17.7)           | 1039 (25.1)         | --                                   | --                  | 436 (12.6)          |
| South                                                  | 3902 (48.9)           | 879 (21.3)          | --                                   | --                  | 1423 (41.1)         |
| Midwest                                                | 1854 (23.2)           | 1185 (28.7)         | --                                   | --                  | 126 (3.6)           |
| West                                                   | 816 (10.2)            | 1030 (24.9)         | --                                   | --                  | 1476 (42.6)         |
| <b>Current smoking, n (%)</b>                          | 901 (11.3)            | 449 (10.9)          | 202 (10.9)                           | 723 (41.2)          | 233 (6.7)           |
| <b>Cardiovascular disease, n (%) <sup>e</sup></b>      | 1355 (17)             | 647 (15.7)          | 191 (10.3)                           | 0 (0)               | 356 (10.3)          |
| <b>Diabetes, n (%)</b>                                 | 1054 (13.2)           | 285 (6.9)           | 436 (23.5)                           | 8 (0.5)             | 278 (8)             |
| <b>BMI, kg/m<sup>2</sup> (SD)</b>                      | 31 (6.5)              | 29.6 (6.1)          | 33.3 (7.8)                           | 24 (4.4)            | 28.9 (5.8)          |
| <b>Physical Activity, MET-h/week (SD) <sup>d</sup></b> | 9.7 (12.7)            | 10.2 (12.8)         | --                                   | --                  | 10.8 (13.8)         |
| <b>Alcohol drinking, serving/week (SD)</b>             | 1.1 (3.9)             | 2.3 (5.1)           | 1.5 (6.2)                            | 3.5 (5.8)           | 1.3 (3.9)           |
| <b>Total energy intake, kcal/day (SD)</b>              | 1614.1 (759.5)        | 1683.3 (663.1)      | 1826.2 (751.8)                       | 1757.0 (579.6)      | 1656.7 (777.4)      |

Abbreviations: AA (African American), ADHF (acute decompensated heart failure), BMI (body mass index), EA (European American), FHS (Framingham Heart Study), HA (Hispanic American), HF (heart failure), HFpEF (heart failure with preserved ejection fraction), HFrfEF (heart failure with reduced ejection fraction), JHS (Jackson Heart Study), LVEF (left ventricular ejection fraction), SD (standard deviation), WHI (Women's Health Initiative Study).

<sup>a</sup> Continuous variables were presented as mean (SD).

<sup>b</sup> 62.0% in the JHS and 52.5% in the FHS participants were women.

<sup>c</sup> HF was defined as having ADHF or chronic stable HF, and further classified as HFrEF (LVEF < 45%) or HFpEF (LVEF ≥ 45%). For WHI patients with ADHF, LVEF closest to the diagnosis date of ADHF was used, and for patients with chronic stable HF, baseline LVEF or lowest estimated LVEF on medical records were used to classify HF subtypes. In the JHS, considering over 50% of ADHF patients were missing LVEF, baseline LVEF was used to determine HFrEF and HFpEF for those without coronary heart disease before HF, and for chronic stable HF patients, baseline LVEF was used. In the FHS, HF was defined as incident or prevalent congestive HF. Since LVEF was not measured at baseline, LVEF closest to the diagnosis date of HF was used to define HFrEF and HFpEF. Participants without LVEF measurement were excluded in the analysis.

<sup>d</sup> Results in the replication populations were not presented for variables which were not applicable (region) or measured in different scales (physical activity) .

<sup>e</sup> Cardiovascular disease was defined as self-reported coronary heart disease, heart failure, stroke, and peripheral artery disease at baseline.

**Table 2. Newly Discovered Loci for Heart Failure among Women across Ethnicities in the Women’s Health Initiative Study, Jackson Heart Study and Framingham Heart Study.**

| Lead SNP                         | Position (hg19) | Candidate Gene <sup>a</sup> | AI 1/<br>AI 2 | Discovery <sup>b</sup> |                      | Validation <sup>c</sup> |                      | Cross-ethnicity Meta-analysis <sup>d</sup> |                      |
|----------------------------------|-----------------|-----------------------------|---------------|------------------------|----------------------|-------------------------|----------------------|--------------------------------------------|----------------------|
|                                  |                 |                             |               | β (SE)                 | P value              | β (SE)                  | P value              | Direction                                  | FDR-q value          |
| <b>European American - HFrEF</b> |                 |                             |               |                        |                      |                         |                      |                                            |                      |
| rs12719020                       | 7:51066547      | Near <i>COBL</i>            | A/C           | 1.08 (0.2)             | 3.1×10 <sup>-6</sup> | 2.59 (0.9)              | 0.02                 | +++?+ <sup>e</sup>                         | 8.8×10 <sup>-4</sup> |
| <b>European American - HFpEF</b> |                 |                             |               |                        |                      |                         |                      |                                            |                      |
| rs12599260                       | 16:50093238     | Near <i>HEATR3</i>          | A/G           | -0.42 (0.1)            | 4.9×10 <sup>-6</sup> | -0.43 (0.2)             | 5.5×10 <sup>-3</sup> | +----                                      | 0.01                 |
| <b>African American - HFpEF</b>  |                 |                             |               |                        |                      |                         |                      |                                            |                      |
| rs12067046                       | 1:208913216     | Near <i>PLXNA2</i>          | A/G           | 0.47 (0.1)             | 4.2×10 <sup>-6</sup> | 0.44 (0.2)              | 6.6×10 <sup>-3</sup> | ++---                                      | 7.2×10 <sup>-4</sup> |
| rs114553497                      | 1:229507916     | Near <i>CCSAP, ACTA1</i>    | T/C           | 0.92 (0.2)             | 5.2×10 <sup>-7</sup> | 0.67 (0.3)              | 0.04                 | +?+?                                       | 1.6×10 <sup>-4</sup> |
| rs10229703                       | 7:134661230     | Near <i>CALD1, AGBL3</i>    | A/G           | 0.49 (0.1)             | 3.6×10 <sup>-6</sup> | 0.41 (0.2)              | 0.02                 | +++--                                      | 7.6×10 <sup>-3</sup> |
| rs149663839                      | 11:34408645     | Near <i>ABTB2, CAT</i>      | A/G           | 2.61 (0.9)             | 1.4×10 <sup>-6</sup> | 1.69 (0.8)              | 5.1×10 <sup>-3</sup> | +??+?                                      | 7.1×10 <sup>-6</sup> |

Abbreviations: AI (allele), FDR (false discovery rate), HFpEF (heart failure with preserved ejection fraction), HFrEF (heart failure with reduced ejection fraction), SE (standard error), SNP (single-nucleotide polymorphism).

<sup>a</sup> Closest genes within ± 300 kb of the lead SNPs.

<sup>b</sup> The discovery populations were African Americans (N=7,982) and European Americans (N=4,133) within the Women’s Health Initiative study.

<sup>c</sup> The validation populations were African Americans women (N=1,853) in the Jackson Heart Study and European American women (N=1,755) in the Framingham Heart Study.

<sup>d</sup> The cross-ethnicity meta-analysis was performed among African Americans, European Americans, and Hispanic Americans in the Women’s health Initiative study, and the Jackson Heart Study and Framing Heart Study.

<sup>e</sup> The following symbols denote the directions of the ethnicity-specific GWAS results: + denotes a positive association between the genetic variant and HF; - denotes a negative association between the genetic variant and HF; and ? denotes the tested variant was not available in the population.



**Table 3. Biological Pathways Enriched for HFrEF and HFpEF among African and European American Women across Ethnicities <sup>a</sup>.**

| Pathway                                     | HFrEF |    |    | HFpEF |    |    |
|---------------------------------------------|-------|----|----|-------|----|----|
|                                             | EA    | AA | HA | EA    | AA | HA |
| <b>Angiogenesis and Vascular Patterning</b> |       |    |    |       |    |    |
| Extracellular matrix-receptor interaction   | X     | X  | X  | X     | X  | X  |
| Cell adhesion molecules                     | X     | X  | X  | X     | X  | X  |
| Axon guidance                               | X     | X  | X  | X     | X  | X  |
| Netrin-1 signaling                          | X     | X  | X  | X     | X  | X  |
| Developmental biology                       | X     | X  | X  | X     | X  | X  |
| Adherens junction                           |       | X  | X  | X     | X  | X  |
| Endocytosis                                 |       | X  | X  | X     | X  | X  |
| Phosphatidylinositol signal system          |       |    |    | X     | X  | X  |
| Vascular smooth muscle contraction          | X     |    | X  | X     | X  |    |
| HS-GAG biosynthesis                         |       | X  |    | X     | X  |    |
| HS-GAG degradation                          |       |    |    | X     | X  |    |
| Mucin type O-glycan biosynthesis            |       | X  | X  | X     |    | X  |
| Pre-Notch expression and processing         |       |    |    | X     |    | X  |
| Signaling by BMP                            |       |    |    |       | X  |    |
| Cell-cell junction organization             |       |    | X  |       | X  |    |
| Intrinsic pathway                           | X     |    | X  |       |    | X  |
| <b>Inflammation</b>                         |       |    |    |       |    |    |
| Extracellular matrix-receptor interaction   | X     | X  | X  | X     | X  | X  |
| Cell adhesion molecules                     | X     | X  | X  | X     | X  | X  |
| Netrin-1 signaling                          | X     | X  | X  | X     | X  | X  |
| Phosphatidylinositol signal system          |       |    |    | X     | X  | X  |
| HS-GAG biosynthesis                         |       | X  |    | X     | X  |    |
| HS-GAG degradation                          |       |    |    | X     | X  |    |
| Rac1 pathway                                | X     |    |    |       | X  |    |
| NRAGE signals death through JNK             |       | X  |    | X     |    |    |
| Signaling by Rho GTPases                    |       | X  | X  | X     |    | X  |
| Cell-cell junction organization             |       |    | X  |       | X  |    |
| Intrinsic pathway                           | X     |    | X  |       |    | X  |

Abbreviations: AA (African Americans), BMP (Bone morphogenetic proteins), EA (European Americans), GAG (glycosaminoglycan), HA (Hispanic American), HFpEF (heart failure with preserved ejection fraction), HFrEF (heart failure with reduced ejection fraction), HS (Heparan sulfate), JNK (JUN Kinase).

<sup>a</sup> Biological pathways presented in the table were those identified from AA and EA women in the Women’s Health Initiative Study, and validated in the Jackson Heart Study and Framingham Heart Study. A pathway was marked with “X” when nominal *P* value from GSA-SNP or Mergeomics < 0.05 in the Women’s Health Initiative Study

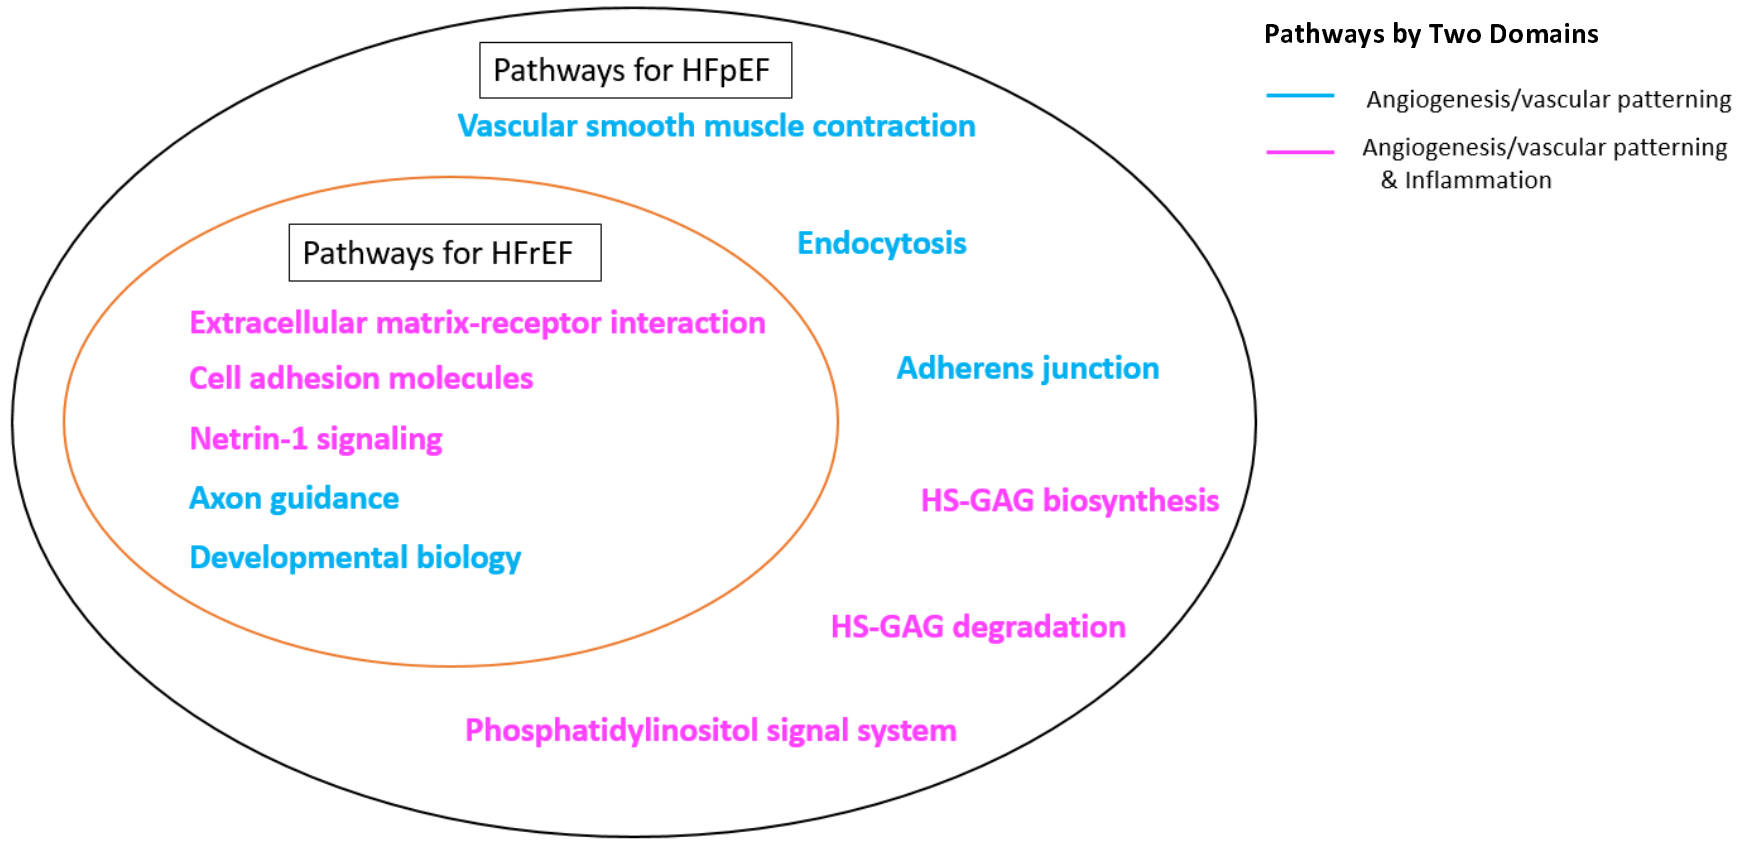

**Figure 1. Venn Diagram for Biological Pathways Enriched for HFrEF and HFpEF among African and European American Women across Ethnicities**

Abbreviations: GAG (glycosaminoglycan), HFpEF (heart failure with preserved ejection fraction), HFrEF (heart failure with reduced ejection fraction), HS (Heparan sulfate).

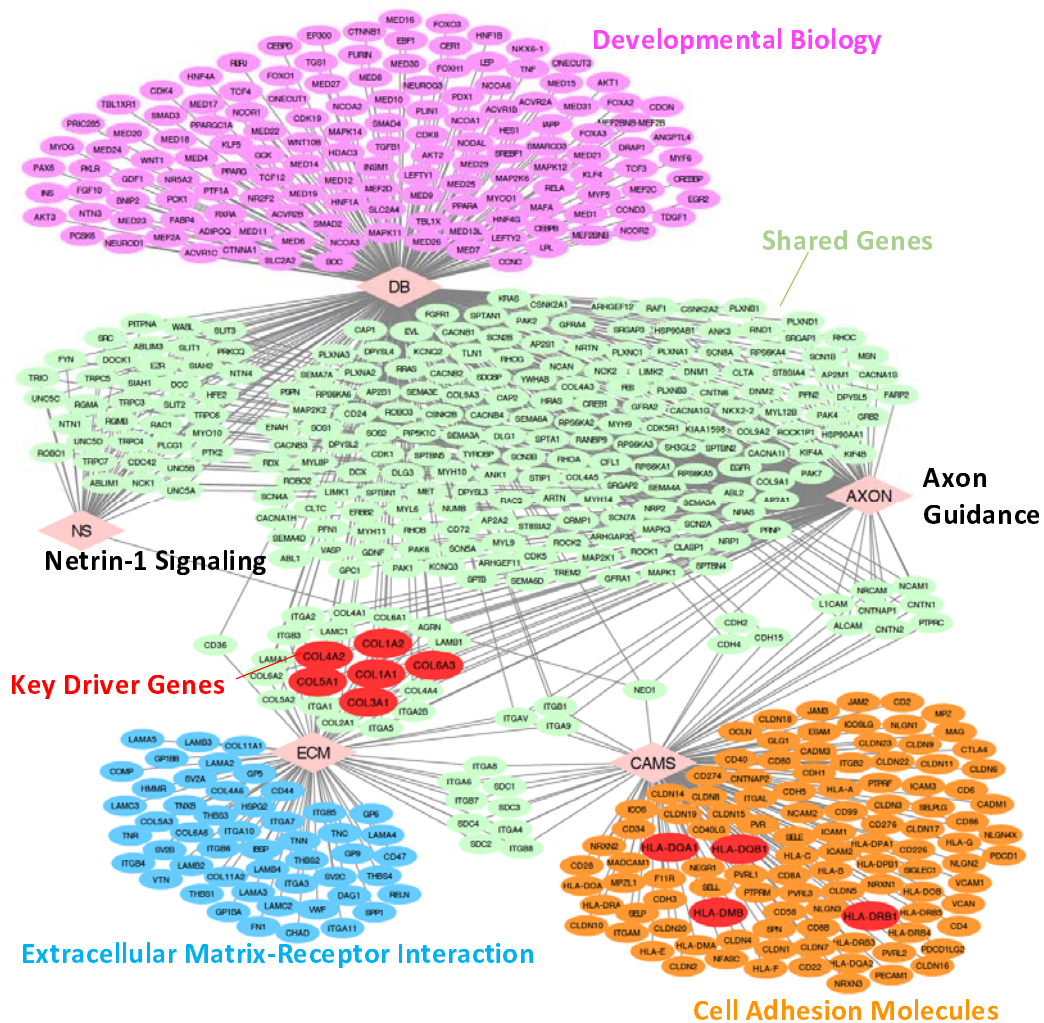

**Figure 2. Network of 5 Pathways Enriched for HFReF and HFpEF with Top 10 Key Driver Genes among African and European American Women.**

The diamond nodes represent pathway and the ellipse nodes represent genes, and the edge shows the interaction, that is, the association between a gene and a pathway. The color nodes are: red, top 10 key driver genes; light green, genes involved in  $\geq 2$  pathways; others are pathway-specific genes. The figure was created using Cytoscape<sup>86</sup>.

Abbreviations: AXON (axon guidance), CAMS (Cell adhesion molecules), DB (developmental biology), ECM (Extracellular matrix-receptor interaction), HFpEF (heart failure with preserved ejection fraction), HFReF (heart failure with reduced ejection fraction), NS (Netrin-1 signaling).

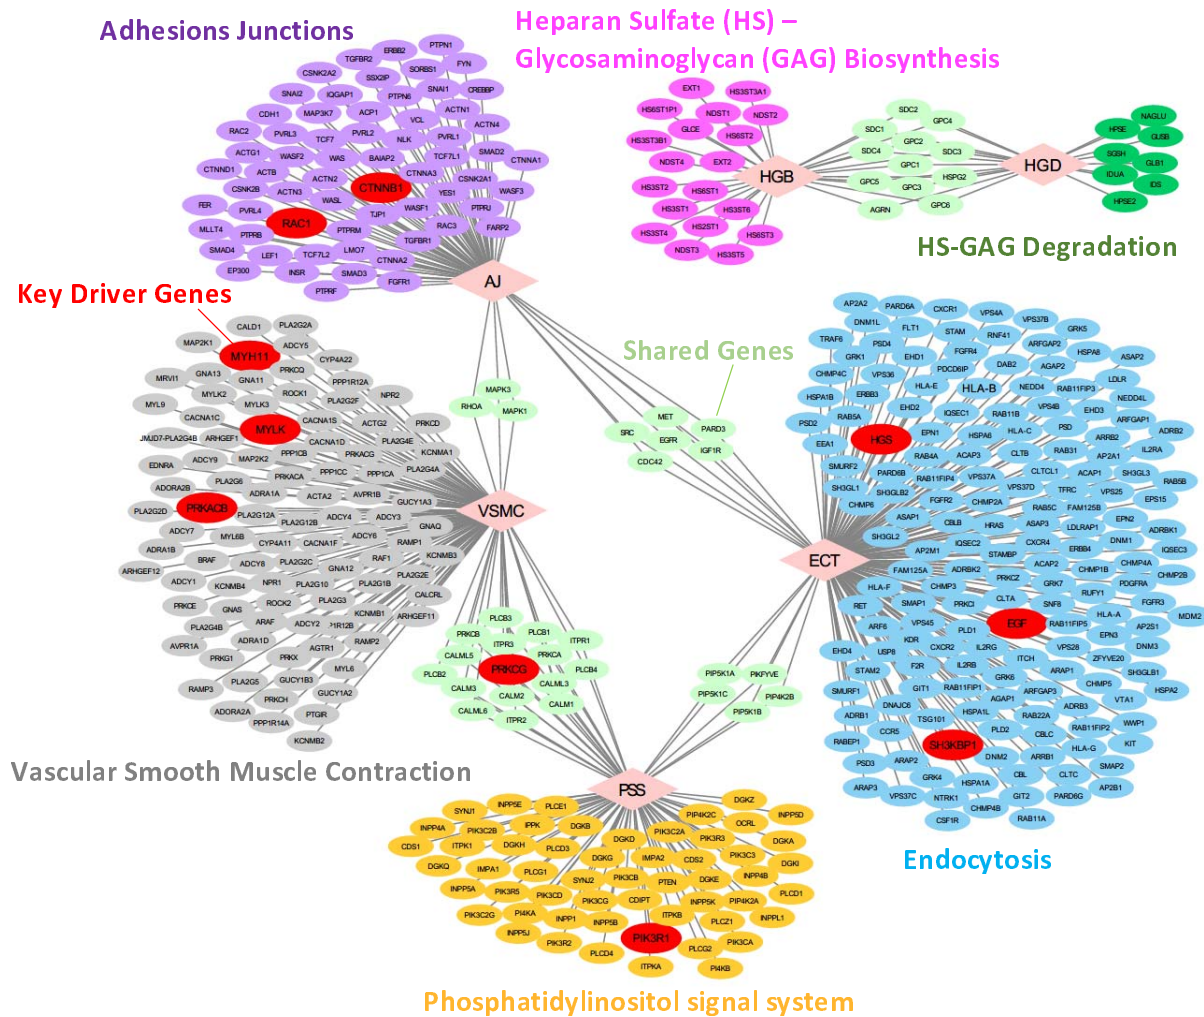

**Figure 3. Network of 6 Pathways Enriched for HFpEF with Top 10 Key Driver Genes among African and European American Women.**

The diamond nodes represent pathway and the ellipse nodes represent genes, and the edge shows the interaction, that is, the association between a gene and a pathway. The color nodes are: red, top 10 key driver genes; light green, genes involved in  $\geq 2$  pathways; others are pathway-specific genes. The figure was created using Cytoscape<sup>86</sup>.

Abbreviations: AJ (adherens junction), ECT (endocytosis), HGB (heparan sulfate-glycosaminoglycan biosynthesis), HGD (heparan sulfate-glycosaminoglycan degradation), HFpEF (heart failure with preserved ejection fraction), PSS (phosphatidylinositol signal system), VSMC (vascular smooth muscle contraction).



## References

1. Benjamin EJ, Virani SS, Callaway CW, et al. Heart Disease and Stroke Statistics-2018 Update: A Report From the American Heart Association. *Circulation* 2018;137:e67-e492.
2. Eaton CB, Pettinger M, Rossouw J, et al. Risk Factors for Incident Hospitalized Heart Failure With Preserved Versus Reduced Ejection Fraction in a Multiracial Cohort of Postmenopausal Women. *Circulation Heart failure* 2016;9.
3. Dries DL, Exner DV, Gersh BJ, Cooper HA, Carson PE, Domanski MJ. Racial differences in the outcome of left ventricular dysfunction. *The New England journal of medicine* 1999;340:609-16.
4. Bahrami H, Kronmal R, Bluemke DA, et al. Differences in the incidence of congestive heart failure by ethnicity: the multi-ethnic study of atherosclerosis. *Archives of internal medicine* 2008;168:2138-45.
5. Eaton CB, Abdulbaki AM, Margolis KL, et al. Racial and ethnic differences in incident hospitalized heart failure in postmenopausal women: the Women's Health Initiative. *Circulation* 2012;126:688-96.
6. Loehr LR, Rosamond WD, Chang PP, Folsom AR, Chambless LE. Heart failure incidence and survival (from the Atherosclerosis Risk in Communities study). *The American journal of cardiology* 2008;101:1016-22.
7. Yancy CW, Jessup M, Bozkurt B, et al. 2013 ACCF/AHA guideline for the management of heart failure: executive summary: a report of the American College of Cardiology Foundation/American Heart Association Task Force on practice guidelines. *Circulation* 2013;128:1810-52.
8. Schwartzberg S, Redfield MM, From AM, Sorajja P, Nishimura RA, Borlaug BA. Effects of vasodilation in heart failure with preserved or reduced ejection fraction implications of distinct pathophysiologies on response to therapy. *J Am Coll Cardiol* 2012;59:442-51.
9. Zile MR, Brutsaert DL. New concepts in diastolic dysfunction and diastolic heart failure: Part II: causal mechanisms and treatment. *Circulation* 2002;105:1503-8.
10. Lopes LR, Elliott PM. Genetics of heart failure. *Biochim Biophys Acta* 2013;1832:2451-61.
11. Aragam KG, Chaffin M, Levinson RT, et al. Phenotypic Refinement of Heart Failure in a National Biobank Facilitates Genetic Discovery. *Circulation* 2018.
12. Franceschini N, Kopp JB, Barac A, et al. Association of APOL1 With Heart Failure With Preserved Ejection Fraction in Postmenopausal African American Women. *JAMA Cardiol* 2018;3:712-20.
13. Tayal U, Prasad S, Cook SA. Genetics and genomics of dilated cardiomyopathy and systolic heart failure. *Genome Med* 2017;9:20.
14. Nam D, Kim J, Kim SY, Kim S. GSA-SNP: a general approach for gene set analysis of polymorphisms. *Nucleic acids research* 2010;38:W749-54.
15. Arneson D, Bhattacharya A, Shu L, Makinen VP, Yang X. Mergeomics: a web server for identifying pathological pathways, networks, and key regulators via multidimensional data integration. *BMC genomics* 2016;17:722.
16. Design of the Women's Health Initiative clinical trial and observational study. The Women's Health Initiative Study Group. *Controlled clinical trials* 1998;19:61-109.
17. Rosamond WD, Chang PP, Baggett C, et al. Classification of heart failure in the atherosclerosis risk in communities (ARIC) study: a comparison of diagnostic criteria. *Circulation Heart failure* 2012;5:152-9.

18. Hall PS, Nah G, Howard BV, et al. Reproductive Factors and Incidence of Heart Failure Hospitalization in the Women's Health Initiative. *Journal of the American College of Cardiology* 2017;69:2517-26.
19. Willer CJ, Li Y, Fau - Abecasis GR, Abecasis GR. METAL: fast and efficient meta-analysis of genomewide association scans.
20. Kyoto Encyclopedia of Genes and Genomes. 2018. (Accessed Oct 17th, 2018, at <https://www.genome.jp/kegg/>.)
21. Reactome. 2018. (Accessed Oct 17th, 2018, at <https://reactome.org/>.)
22. BioCarta. 2018. (Accessed Oct 17th, 2018, at <http://software.broadinstitute.org/gsea/msigdb/genesets.jsp?collection=CP:BIOCARTA>.)
23. Zhu J, Zhang B, Smith EN, et al. Integrating large-scale functional genomic data to dissect the complexity of yeast regulatory networks. *Nat Genet* 2008;40:854-61.
24. Wang IM, Zhang B, Yang X, et al. Systems analysis of eleven rodent disease models reveals an inflammatoric signature and key drivers. *Mol Syst Biol* 2012;8:594.
25. Chan KH, Huang YT, Meng Q, et al. Shared molecular pathways and gene networks for cardiovascular disease and type 2 diabetes mellitus in women across diverse ethnicities. *Circulation Cardiovascular genetics* 2014;7:911-9.
26. GWAS Catalog. 2018. (Accessed Oct 18th, 2018, at <https://www.ebi.ac.uk/gwas/>.)
27. Kei AA, Filippatos TD, Tsimihodimos V, Elisaf MS. A review of the role of apolipoprotein C-II in lipoprotein metabolism and cardiovascular disease. *Metabolism* 2012;61:906-21.
28. Haan MN, Mayeda ER. Apolipoprotein E Genotype and Cardiovascular Diseases in the Elderly. *Curr Cardiovasc Risk Rep* 2010;4:361-8.
29. Torn C, Hadley D, Lee HS, et al. Role of Type 1 Diabetes-Associated SNPs on Risk of Autoantibody Positivity in the TEDDY Study. *Diabetes* 2015;64:1818-29.
30. Sun Q, Liu S, Liu K, Jiao K. Role of Semaphorin Signaling During Cardiovascular Development. *Journal of the American Heart Association* 2018;7.
31. Takamatsu H, Kumanogoh A. Diverse roles for semaphorin-plexin signaling in the immune system. *Trends Immunol* 2012;33:127-35.
32. Zhang W, Hui KY, Gusev A, et al. Extended haplotype association study in Crohn's disease identifies a novel, Ashkenazi Jewish-specific missense mutation in the NF-kappaB pathway gene, HEATR3. *Genes Immun* 2013;14:310-6.
33. Ribeiro-Samora GA, Rabelo LA, Ferreira ACC, et al. Inflammation and oxidative stress in heart failure: effects of exercise intensity and duration. *Braz J Med Biol Res* 2017;50:e6393.
34. Wallner M, Eaton DM, Berretta RM, et al. A Feline HFpEF Model with Pulmonary Hypertension and Compromised Pulmonary Function. *Sci Rep* 2017;7:16587.
35. Moreno-Vinasco L, Garcia JG. Receptor tyrosine kinase inhibitors in rodent pulmonary hypertension. *Adv Exp Med Biol* 2010;661:419-34.
36. de las Fuentes L, Yang W, Davila-Roman VG, Gu C. Pathway-based genome-wide association analysis of coronary heart disease identifies biologically important gene sets. *European journal of human genetics : EJHG* 2012;20:1168-73.
37. Wang L, Jing J, Fu Q, et al. Association study of genetic variants at newly identified lipid gene TRIB1 with coronary heart disease in Chinese Han population. *Lipids Health Dis* 2015;14:46.
38. Wells QS, Veatch OJ, Fessel JP, et al. Genome-wide association and pathway analysis of left ventricular function after anthracycline exposure in adults. *Pharmacogenet Genomics* 2017;27:247-54.

39. Lu P, Takai K Fau - Weaver VM, Weaver Vm Fau - Werb Z, Werb Z. Extracellular matrix degradation and remodeling in development and disease. *LID - 10.1101/cshperspect.a005058* [doi] *LID - a005058* [pii].
40. Mecham RP. Overview of extracellular matrix.
41. Gattazzo F, Urciuolo A, Bonaldo P. Extracellular matrix: a dynamic microenvironment for stem cell niche.
42. Gerhardt H, Golding M Fau - Fruttiger M, Fruttiger M Fau - Ruhrberg C, et al. VEGF guides angiogenic sprouting utilizing endothelial tip cell filopodia.
43. Ruhrberg C, Gerhardt H Fau - Golding M, Golding M Fau - Watson R, et al. Spatially restricted patterning cues provided by heparin-binding VEGF-A control blood vessel branching morphogenesis.
44. Mettouchi A. The role of extracellular matrix in vascular branching morphogenesis. *Cell Adh Migr* 2012;6:528-34.
45. Mitra SK, Hanson Da Fau - Schlaepfer DD, Schlaepfer DD. Focal adhesion kinase: in command and control of cell motility.
46. Jourdan-Lesaux C, Zhang J, Lindsey ML. Extracellular matrix roles during cardiac repair. *Life sciences* 2010;87:391-400.
47. Bayomy AF, Bauer M, Qiu Y, Liao R. Regeneration in heart disease-Is ECM the key? *Life sciences* 2012;91:823-7.
48. Bader AG, Kang S Fau - Zhao L, Zhao L Fau - Vogt PK, Vogt PK. Oncogenic PI3K deregulates transcription and translation.
49. Dillon RL, White De Fau - Muller WJ, Muller WJ. The phosphatidyl inositol 3-kinase signaling network: implications for human breast cancer.
50. Kane LP, Shapiro Vs Fau - Stokoe D, Stokoe D Fau - Weiss A, Weiss A. Induction of NF-kappaB by the Akt/PKB kinase.
51. Ozes ON, Mayo LD, Gustin JA, Pfeffer SR, Pfeffer LM, Donner DB. NF- $\kappa$ B activation by tumour necrosis factor requires the Akt serine-threonine kinase. *Nature* 1999;401:82.
52. Romashkova JA, Makarov SS. NF-kappaB is a target of AKT in anti-apoptotic PDGF signalling.
53. Sizemore N, Leung S Fau - Stark GR, Stark GR. Activation of phosphatidylinositol 3-kinase in response to interleukin-1 leads to phosphorylation and activation of the NF-kappaB p65/RelA subunit.
54. Li Y, Corradetti Mn Fau - Inoki K, Inoki K Fau - Guan K-L, Guan KL. TSC2: filling the GAP in the mTOR signaling pathway.
55. Tan C, Cruet-Hennequart S Fau - Troussard A, Troussard A Fau - Fazli L, et al. Regulation of tumor angiogenesis by integrin-linked kinase (ILK).
56. Zhong H, Chiles K, Feldser D, et al. Modulation of hypoxia-inducible factor 1 $\alpha$  expression by the epidermal growth factor/phosphatidylinositol 3-kinase/PTEN/AKT/FRAP pathway in human prostate cancer cells: implications for tumor angiogenesis and therapeutics. *Cancer research* 2000;60:1541-5.
57. Ghigo A, Laffargue M, Li M, Hirsch E. PI3K and Calcium Signaling in Cardiovascular Disease. *Circulation research* 2017;121:282-92.
58. Aoyagi T, Matsui T. Phosphoinositide-3 kinase signaling in cardiac hypertrophy and heart failure. *Current pharmaceutical design* 2011;17:1818-24.
59. Hordijk PL. Regulation of NADPH oxidases: the role of Rac proteins. *Circ Res* 2006;98:453-62.
60. Arbibe L, Mira Jp Fau - Teusch N, Teusch N Fau - Kline L, et al. Toll-like receptor 2-mediated NF-kappa B activation requires a Rac1-dependent pathway.



61. Khan OM, Ibrahim Mx Fau - Jonsson I-M, Jonsson Im Fau - Karlsson C, et al. Geranylgeranyltransferase type I (GGTase-I) deficiency hyperactivates macrophages and induces erosive arthritis in mice.
62. Adam O, Frost G, Custodis F, et al. Role of Rac1 GTPase activation in atrial fibrillation. *J Am Coll Cardiol* 2007;50:359-67.
63. Ceneri N, Zhao L, Young BD, et al. Rac2 Modulates Atherosclerotic Calcification by Regulating Macrophage Interleukin-1beta Production. *Arterioscler Thromb Vasc Biol* 2017;37:328-40.
64. Satoh M, Ogita H, Takeshita K, Mukai Y, Kwiatkowski DJ, Liao JK. Requirement of Rac1 in the development of cardiac hypertrophy. *Proc Natl Acad Sci U S A* 2006;103:7432-7.
65. Do e Z, Fukumoto Y, Sugimura K, et al. Rho-kinase activation in patients with heart failure. *Circ J* 2013;77:2542-50.
66. Ridker PM, Everett BM, Thuren T, et al. Antiinflammatory Therapy with Canakinumab for Atherosclerotic Disease. *The New England journal of medicine* 2017;377:1119-31.
67. Leask A. TGFbeta, cardiac fibroblasts, and the fibrotic response. *Cardiovasc Res* 2007;74:207-12.
68. Morrell NW, Bloch DB, ten Dijke P, et al. Targeting BMP signalling in cardiovascular disease and anaemia. *Nat Rev Cardiol* 2016;13:106-20.
69. Morine KJ, Qiao X, York S, et al. Bone Morphogenetic Protein 9 Reduces Cardiac Fibrosis and Improves Cardiac Function in Heart Failure. *Circulation* 2018.
70. Makinen VP, Civelek M, Meng Q, et al. Integrative genomics reveals novel molecular pathways and gene networks for coronary artery disease. *PLoS genetics* 2014;10:e1004502.
71. Wang L, Perez J, Heard-Costa N, et al. Integrating genetic, transcriptional, and biological information provides insights into obesity. *International journal of obesity (2005)* 2018.
72. Roark CL, Anderson KM, Simon LJ, Schuyler RP, Aubrey MT, Freed BM. Multiple HLA epitopes contribute to type 1 diabetes susceptibility. *Diabetes* 2014;63:323-31.
73. Zanelli E, Breedveld Fc Fau - de Vries RR, de Vries RR. HLA association with autoimmune disease: a failure to protect?
74. Nakken B, Jonsson R Fau - Brokstad KA, Brokstad Ka Fau - Omholt K, et al. Associations of MHC class II alleles in Norwegian primary Sjogren's syndrome patients: implications for development of autoantibodies to the Ro52 autoantigen.
75. Garrity-Park MM, Loftus Ev Jr Fau - Sandborn WJ, Sandborn Wj Fau - Bryant SC, Bryant Sc Fau - Smyrk TC, Smyrk TC. MHC Class II alleles in ulcerative colitis-associated colorectal cancer.
76. Morris DL, Taylor Ke Fau - Fernando MMA, Fernando Mm Fau - Nititham J, et al. Unraveling multiple MHC gene associations with systemic lupus erythematosus: model choice indicates a role for HLA alleles and non-HLA genes in Europeans.
77. Poschl E, Schlotzer-Schrehardt U Fau - Brachvogel B, Brachvogel B Fau - Saito K, Saito K Fau - Ninomiya Y, Ninomiya Y Fau - Mayer U, Mayer U. Collagen IV is essential for basement membrane stability but dispensable for initiation of its assembly during early development.
78. Kuo DS, Labelle-Dumais C Fau - Gould DB, Gould DB. COL4A1 and COL4A2 mutations and disease: insights into pathogenic mechanisms and potential therapeutic targets.
79. Kamphaus GD, Colorado Pc Fau - Panka DJ, Panka Dj Fau - Hopfer H, et al. Canstatin, a novel matrix-derived inhibitor of angiogenesis and tumor growth.

80. Meuwissen ME, Halley DJA-Ohoo, Smit LSA-Ohoo, et al. The expanding phenotype of COL4A1 and COL4A2 mutations: clinical data on 13 newly identified families and a review of the literature.
81. Yang W, Ng FL, Chan K, et al. Coronary-Heart-Disease-Associated Genetic Variant at the COL4A1/COL4A2 Locus Affects COL4A1/COL4A2 Expression, Vascular Cell Survival, Atherosclerotic Plaque Stability and Risk of Myocardial Infarction. *PLoS Genet* 2016;12:e1006127.
82. Zhu L, Vranckx R Fau - Khau Van Kien P, Khau Van Kien P Fau - Lalande A, et al. Mutations in myosin heavy chain 11 cause a syndrome associating thoracic aortic aneurysm/aortic dissection and patent ductus arteriosus.
83. Takeda N, Morita H, Fujita D, et al. A deleterious MYH11 mutation causing familial thoracic aortic dissection.
84. Wang L, Guo Dc Fau - Cao J, Cao J Fau - Gong L, et al. Mutations in myosin light chain kinase cause familial aortic dissections.
85. Lindsay ME, Dietz HC. The genetic basis of aortic aneurysm.
86. Shannon P, Markiel A, Ozier O, et al. Cytoscape: a software environment for integrated models of biomolecular interaction networks. *Genome research* 2003;13:2498-504.
